# Supplementary material for: One-step synthesis of SnO2 nanoparticles-loaded graphitic carbon nitride and their application in thermal decomposition of ammonium perchlorate
Source: Royal Society of Chemistry journal article supplement (doi:10.1039/c5nj01236h), 2015-01-01
Supplement: c5nj01236h1.pdf [file c5nj01236h1.pdf]

## Supporting information

### **One-step Synthesis of SnO<sub>2</sub> Nanoparticles-Loaded Graphitic Carbon Nitride Hybrids and their Application in Thermal Decomposition of Ammonium Perchlorate**

Qi Li,<sup>1</sup> Yi He,<sup>2,\*</sup> and Rufang Peng,<sup>1,\*</sup>

*<sup>1</sup>(State Key Laboratory Cultivation Base for Non-metal Composites and Functional Materials, Southwest University of Science and Technology, Mianyang 621010, P, R, China)*

*<sup>2</sup>(College of Defence Technology, southwest University of Science and Technology, Mianyang, 621010, P, R, China)*

---

\* Corresponding author; Fax: 86-816-2419011; Tel.: 86-816-2419011  
Email: [pengrufang@swust.edu.cn](mailto:pengrufang@swust.edu.cn) [yhe2014@126.com](mailto:yhe2014@126.com)

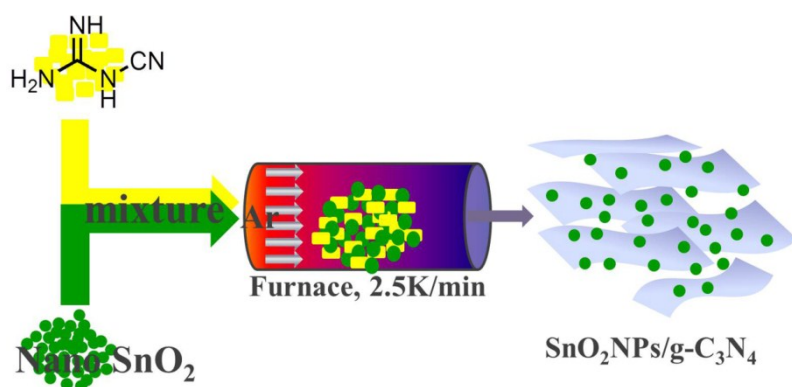

**Fig. S1** Preparation schematic of micron SnO<sub>2</sub>NPs/g-C<sub>3</sub>N<sub>4</sub> of the one-step for calcination

Raw materials of dicyandiamide (DCDA) and high-purity SnO<sub>2</sub> nanoparticles were mixed uniformly, then the mixed powder was placed in the tubular furnace atmosphere and calcined at 550 °C under argon flow with a heating rate of 2.5 K •min<sup>-1</sup>.

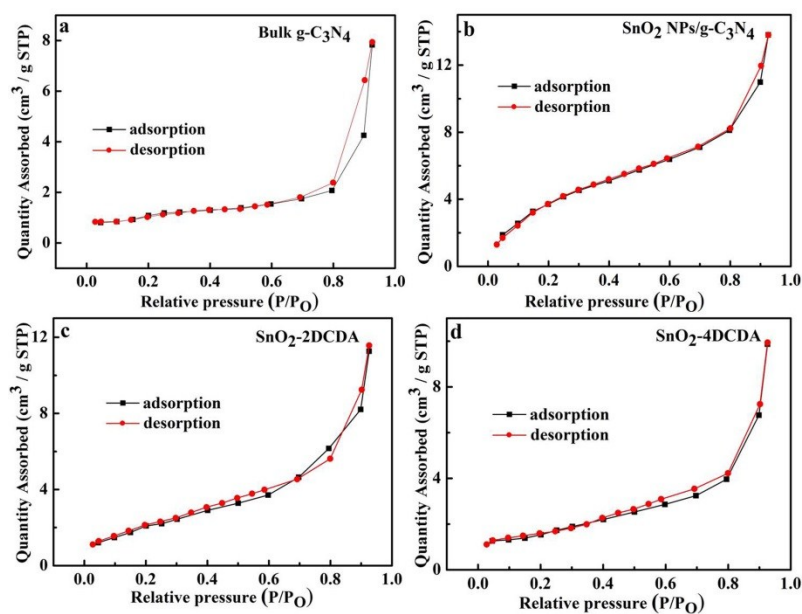

**Fig. S2** The N<sub>2</sub> sorption-desorption isotherm of the bulk g-C<sub>3</sub>N<sub>4</sub> (a), SnO<sub>2</sub>NPs/g-C<sub>3</sub>N<sub>4</sub> hybrids (b), hybrids 2 (prepared by molar ratios of 1:2 between SnO<sub>2</sub>NPs and DCDA) (c), hybrids 3 (prepared by molar ratios of 1:4 between SnO<sub>2</sub>NPs and DCDA) (d).

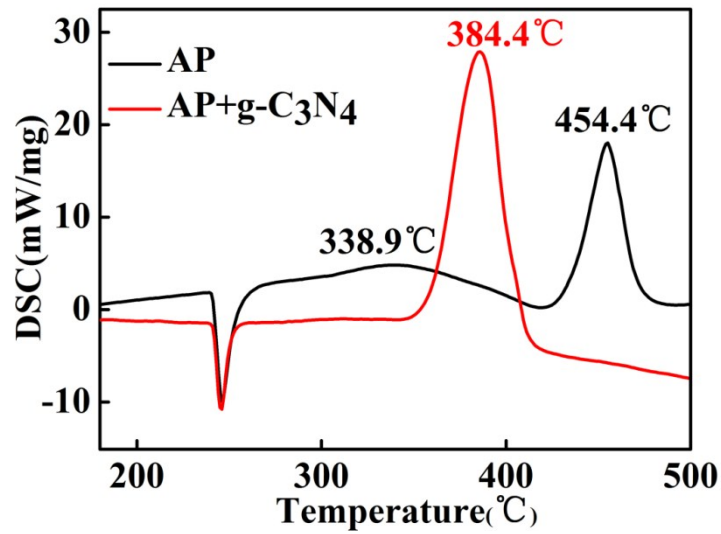

**Fig. S3** DSC curves of pure AP and AP mixed with g-C<sub>3</sub>N<sub>4</sub>.

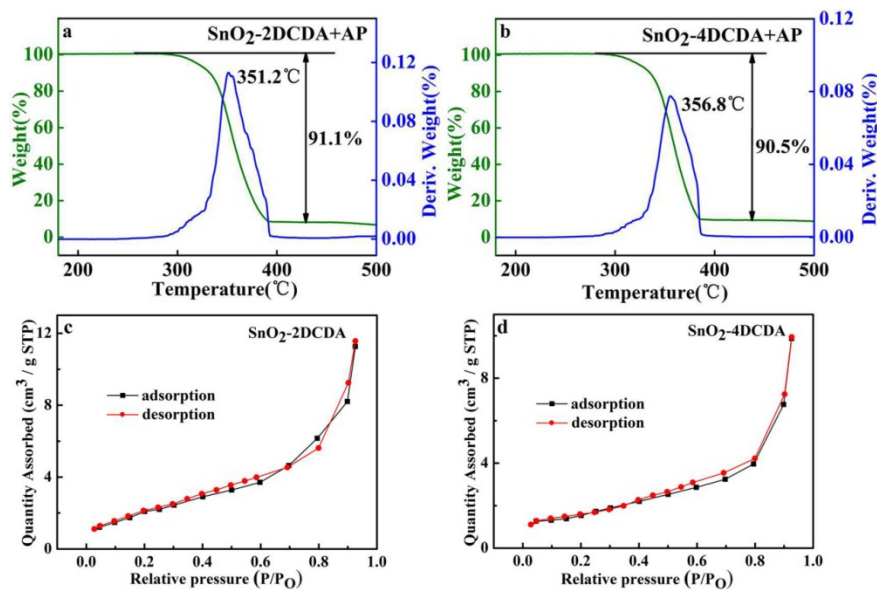

**Fig. S4** (a) TGA-DTG curve of AP mixed with SnO<sub>2</sub>-2DCDA, (b) SnO<sub>2</sub>-4DCDA (the molar ratio between SnO<sub>2</sub>NPs and (DCDA) equal 1:4 and 1:2, respectively.). (c) The N<sub>2</sub> sorption-desorption isotherm of the hybrids 2 (prepared by molar ratios of 1:2 between SnO<sub>2</sub>NPs and DCDA) (c), hybrids 3 (prepared by molar ratios of 1:4 between SnO<sub>2</sub>NPs and DCDA) (d).

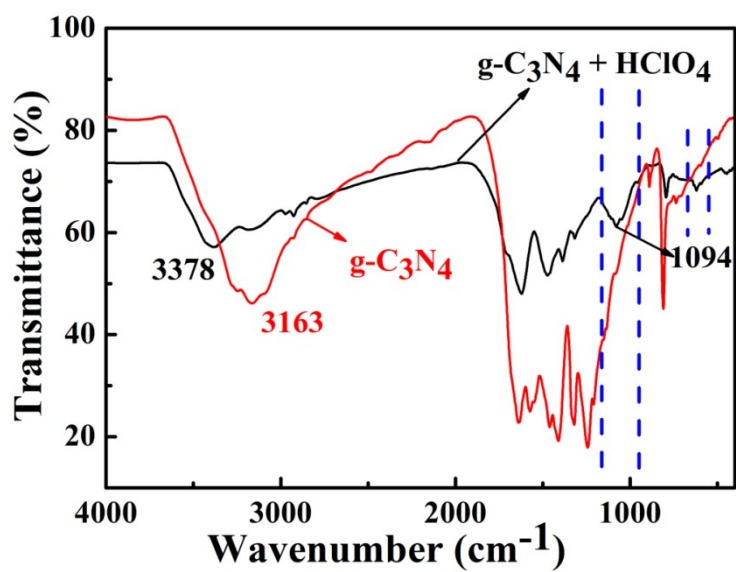

Fig. S5 FT-IR spectra of crude g-C<sub>3</sub>N<sub>4</sub> (red curve), treated g-C<sub>3</sub>N<sub>4</sub> with HClO<sub>4</sub> (black curve).

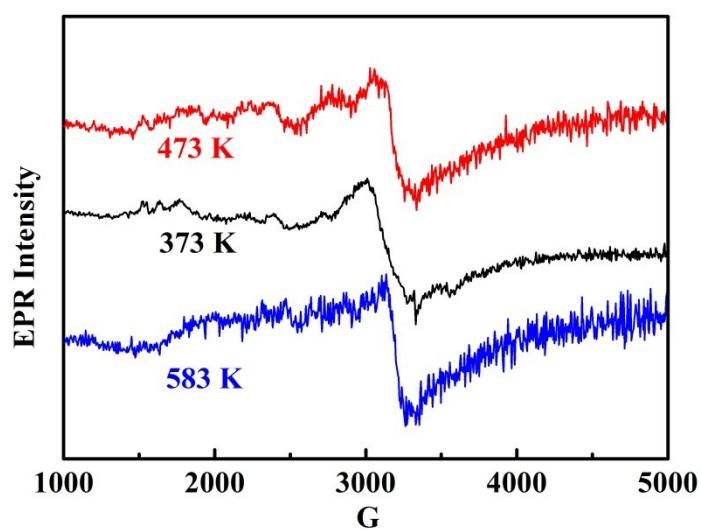

Fig. S6 Typical spin-adduct EPR of superoxide radicals

Fig. S6 exhibited the EPR of SnO<sub>2</sub>NPs/g-C<sub>3</sub>N<sub>4</sub>, the obvious characterization peak is corresponded to the superoxide radicals.<sup>S1</sup>

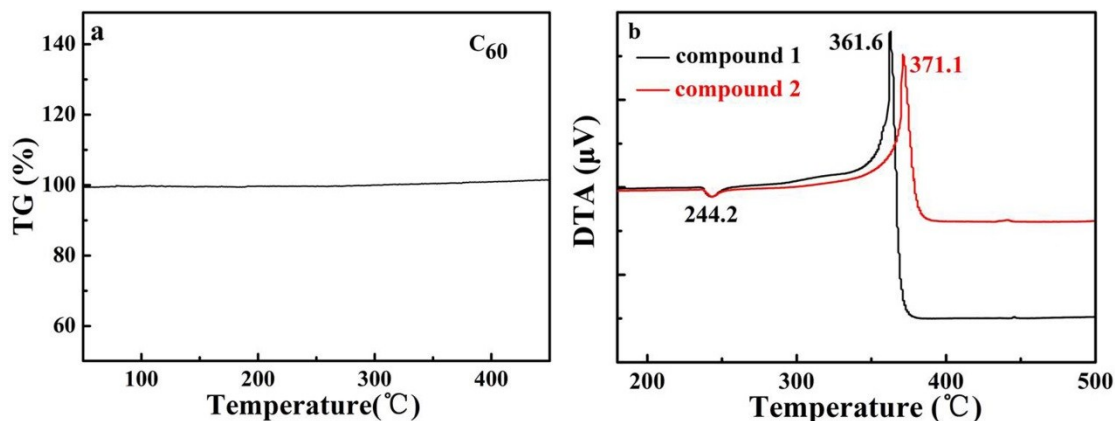

**Fig. S7** (a) The TG curve of C<sub>60</sub>. (b) DTA curves of compound 1 (SnO<sub>2</sub>NPs/g-C<sub>3</sub>N<sub>4</sub> : C<sub>60</sub> : AP = 1 : 1 : 9, weight ratio) and compound 2 (SnO<sub>2</sub>NPs/g-C<sub>3</sub>N<sub>4</sub> : C<sub>60</sub> : AP = 1 : 1.5 : 9).

As shown in Fig. S7, the TG curve of C<sub>60</sub> confirmed that C<sub>60</sub> is very stable before 450 °C. Interestingly, C<sub>60</sub> is a kind of good substance for absorbing electrons and free radicals, so we designed the contrast experiment to verify the production of electron when SnO<sub>2</sub>NPs/g-C<sub>3</sub>N<sub>4</sub> was heat excitation. In the Fig. S6b, for compound 1, compared with the SnO<sub>2</sub>NPs/g-C<sub>3</sub>N<sub>4</sub> hybrids (352.2 °C), the addition of fullerene resulted in lagging of the decomposition temperature (361.6 °C). Meanwhile, for the compound 2, with the increase of fullerene weight, the lagging trend of decomposition temperature was increased. Above results confirmed that SnO<sub>2</sub>NPs/g-C<sub>3</sub>N<sub>4</sub> can product the electrons and holes under heat excitation.
